# Supplementary material
Source: ML conference proceedings conference paper supplement (https://openaccess.thecvf.com/content/ICCV2023/html/Fang_Robust_Heterogeneous_Federated_ICCV_2023_paper.html)
Supplement: Supplementary file 1 [file Fang_Robust_Heterogeneous_Federated_ICCV_2023_supplemental.pdf]

# Robust Heterogeneous Federated Learning under Data Corruption

Xiuwen Fang, Mang Ye\*, Xiyuan Yang

National Engineering Research Center for Multimedia Software, Institute of Artificial Intelligence,  
Hubei Key Laboratory of Multimedia and Network Communication Engineering,  
School of Computer Science, Hubei LuoJia Laboratory, Wuhan University, Wuhan, China

<https://github.com/FangXiuwen/AugHFL>

## Additional Experiments

In this section, we discuss the extensive applicability of our proposed method. Considering that label noise is also another form of data corruption, we validate the effectiveness of AugHFL in heterogeneous federated learning under label noise scenarios. Our approach to generating label noise follows the Fang *et al.* [1]. Here we compare the performance of AugHFL with the SOTA methods under various label noise scenarios (Tabs. 1 and 2), where the noise rate is 0.1 or 0.2, and the noise type is pairflip or symmetric. The baseline refers to the method in which the clients train local models on individual private datasets without federated learning. The experimental results demonstrate that our proposed method exhibits robustness against label noise in various noise settings. In the label noise scenarios, AugHFL is not as effective as RHFL, which is designed for solving the label noise problem. However, AugHFL out-

performs other existing strategies under various noise settings. Overall, AugHFL can handle various forms of data corruption effectively, mitigating the negative effects of image corruption and demonstrating robust performance in label noise scenarios.

## References

- [1] Xiuwen Fang and Mang Ye. Robust federated learning with noisy and heterogeneous clients. In *CVPR*, pages 10062–10071, 2022. 1
- [2] Wenke Huang, Mang Ye, and Bo Du. Learn from others and be yourself in heterogeneous federated learning. In *CVPR*, pages 10133–10143, 2022. 1
- [3] Daliang Li and Junpu Wang. Fedmd: Heterogenous federated learning via model distillation. In *NeurIPS Workshop*, 2019. 1
- [4] Tao Lin, Lingjing Kong, Sebastian U Stich, and Martin Jaggi. Ensemble distillation for robust model fusion in federated learning. 2020. 1

\*Corresponding Author: Mang Ye (yemang@whu.edu.cn)

Table 1. Compare with the state-of-the-art methods when the noise rate  $\mu = 0.1$ . ( $\theta_k$  represents the local model of the client  $c_k$ . The optimal accuracy is marked in bold and the sub-optimal accuracy is underlined. These notes are the same for others.)

| Method        | Pairflip     |              |              |              |              | Symflip      |              |              |              |              |
|---------------|--------------|--------------|--------------|--------------|--------------|--------------|--------------|--------------|--------------|--------------|
|               | $\theta_1$   | $\theta_2$   | $\theta_3$   | $\theta_4$   | Avg          | $\theta_1$   | $\theta_2$   | $\theta_3$   | $\theta_4$   | Avg          |
| Baseline      | 77.98        | 76.75        | 66.89        | 74.33        | 73.99        | 76.20        | 76.05        | 64.96        | 74.31        | 72.88        |
| FedMD [3]     | 74.98        | 76.89        | 67.10        | <u>76.64</u> | 73.90        | 73.23        | 73.66        | 67.72        | 75.54        | 72.54        |
| FedDF [4]     | 76.26        | 75.51        | 68.41        | 76.04        | 74.06        | 72.07        | 75.18        | 67.38        | 74.47        | 72.28        |
| RHFL [1]      | 78.86        | <u>78.76</u> | <u>69.60</u> | 71.83        | 74.76        | <u>78.40</u> | <b>78.36</b> | <b>69.47</b> | <b>76.93</b> | <u>75.79</u> |
| FCCL [2]      | <b>79.26</b> | 78.45        | <b>71.11</b> | <b>78.74</b> | <b>76.97</b> | 72.07        | 75.18        | 67.38        | 74.47        | 72.28        |
| <b>AugHFL</b> | <u>79.16</u> | <b>79.26</b> | 67.50        | 74.91        | <u>75.21</u> | <b>80.03</b> | <u>78.26</u> | <u>68.68</u> | <u>76.28</u> | <b>75.81</b> |

Table 2. Compare with the state-of-the-art methods when the noise rate  $\mu = 0.2$ .

| Method        | Pairflip     |              |              |              |              | Symflip      |              |              |              |              |
|---------------|--------------|--------------|--------------|--------------|--------------|--------------|--------------|--------------|--------------|--------------|
|               | $\theta_1$   | $\theta_2$   | $\theta_3$   | $\theta_4$   | Avg          | $\theta_1$   | $\theta_2$   | $\theta_3$   | $\theta_4$   | Avg          |
| Baseline      | 72.31        | 71.84        | 61.78        | 69.67        | 68.90        | 72.01        | 70.15        | 59.62        | 69.42        | 67.80        |
| FedMD [3]     | 68.00        | 67.81        | 65.67        | <u>74.02</u> | 68.88        | 67.31        | 68.54        | <u>64.48</u> | 71.75        | 68.02        |
| FedDF [4]     | 68.66        | 69.68        | 62.36        | 72.12        | 68.21        | 67.36        | 68.56        | 63.60        | 70.83        | 67.59        |
| RHFL [1]      | <b>77.81</b> | <b>76.09</b> | <b>66.61</b> | 72.78        | <b>73.32</b> | <b>78.14</b> | <u>76.77</u> | 64.23        | <b>73.90</b> | <u>73.26</u> |
| FCCL [2]      | 74.17        | 72.73        | <u>66.06</u> | <b>74.94</b> | 71.98        | 72.07        | <u>75.18</u> | 67.38        | 74.47        | <u>72.28</u> |
| <b>AugHFL</b> | <u>74.32</u> | <u>75.85</u> | 65.88        | 73.22        | <u>72.32</u> | <u>76.87</u> | <b>78.81</b> | <b>65.92</b> | <u>71.83</u> | <b>73.36</b> |
